# Supplementary material
Source: publisher site journal article supplement (https://www.dovepress.com/article/417430)
Supplement: Supplementary file 1 [file get_supplementary_file.php]

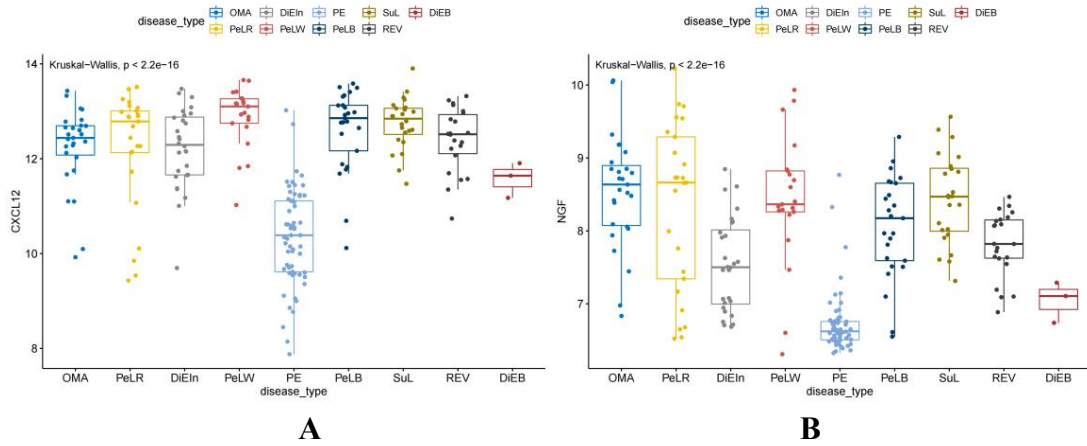

**A**

**B**

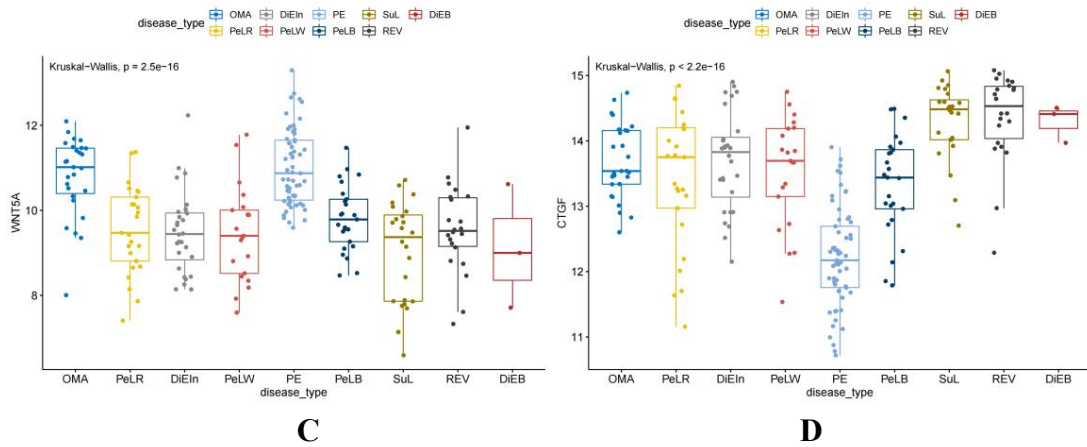

**C**

**D**

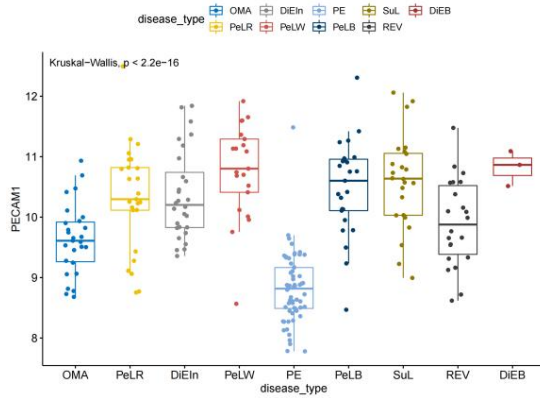

**E**

**Supplementary Fig 1:** The expression of hub genes in EC and EU tissues in different types of endometriosis. **A-E:** The expression of CXCL12, NGF, WNT5A, CTGF, PECAM1 in EC and EU tissues in different types of endometriosis.

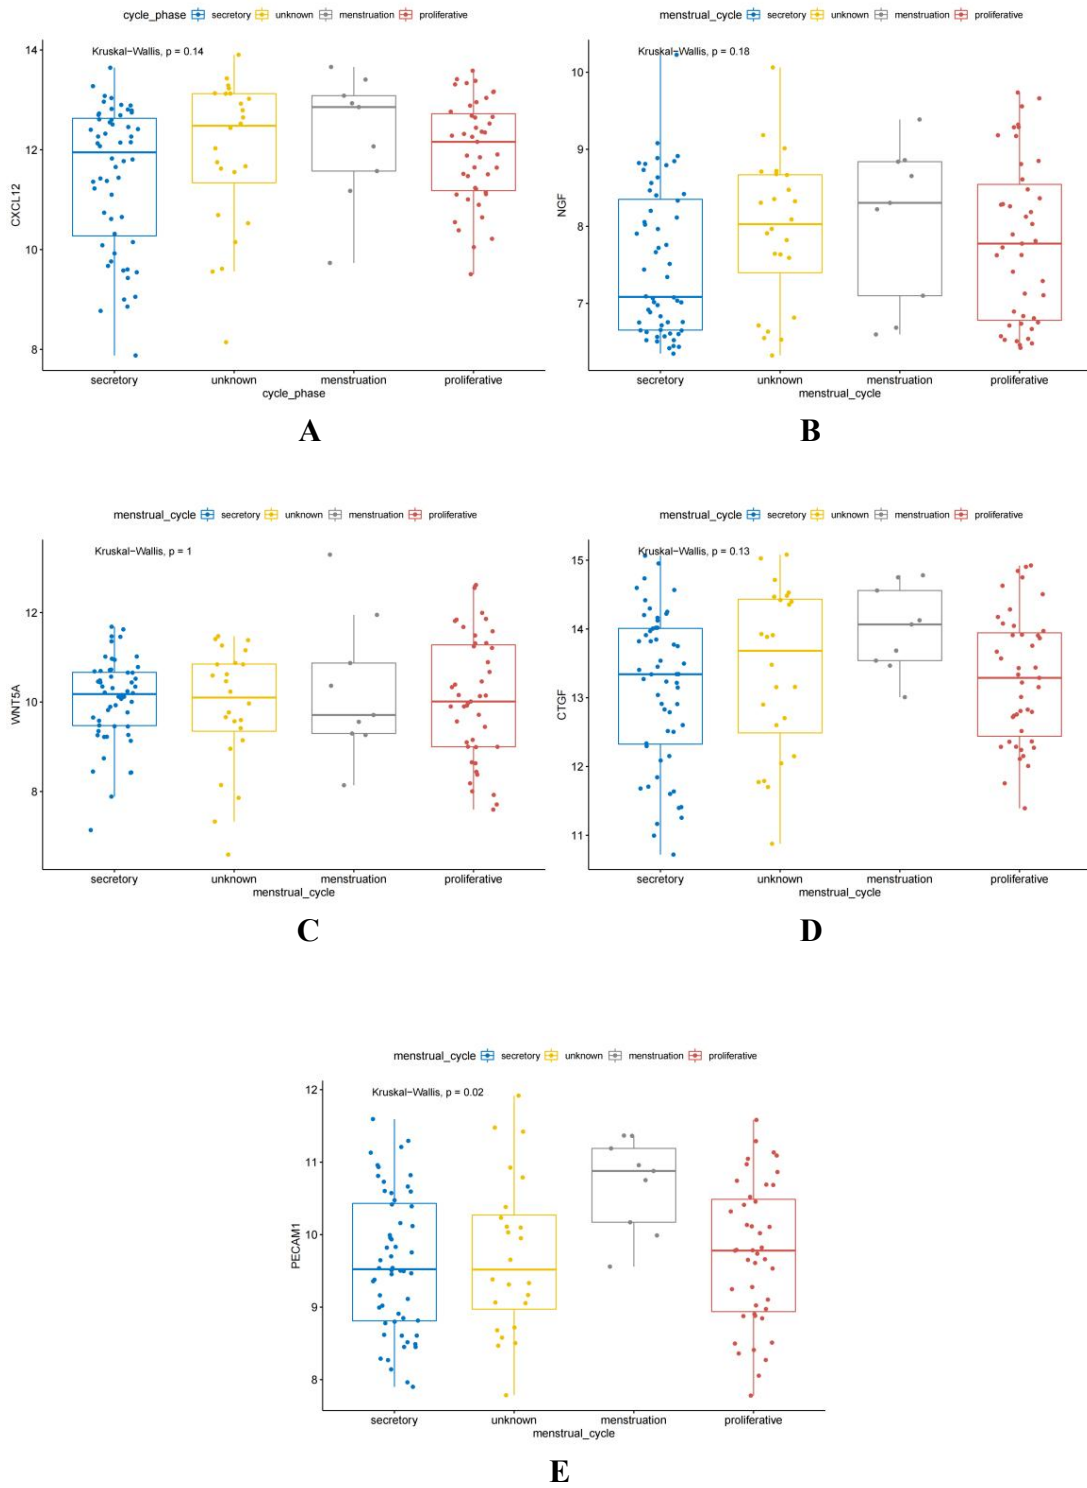

**Supplementary Fig 2:**The expression of hub genes in different menstrual cycles.**A-E:**The expression of CXCL12,NGF,WNT5A,CTGF,PECAM1 in different menstrual cycles.
